# Supplementary material
Source: PubMed Central journal article supplement (PMC2373318)
Supplement: 0801038105_Supplemental_PDF.pdf [file 0801038105_Supplemental_PDF.pdf]

# Supporting Information

Sirikantaramas *et al.* 10.1073/pnas.0801038105

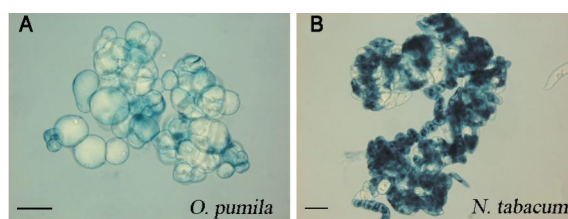

**Fig. S1.** Trypan blue exclusion cell-viability assay of CPT-producing *Ophiorrhiza pumila* (A) and CPT-nonproducing *Nicotiana tabacum* (tobacco BY-2) (B) cocultured with CPT (10  $\mu$ M) for 24 h. Whereas the *O. pumila* cells were resistant, the tobacco cells were sensitive to CPT. (Scale bars: 0.2  $\mu$ m.)

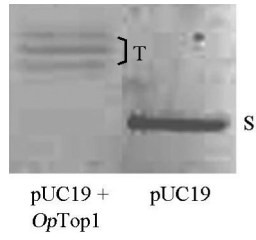

**Fig. S2.** Top1 activity of the *OpTop1* recombinant protein toward pUC19 DNA. Relaxation of the supercoiled plasmid (S) pUC19 by recombinant *OpTop1* from *Escherichia coli*. Topoisomers (T) of the plasmids were generated when the latter were incubated with recombinant *OpTop1* that possesses Top1 activity.

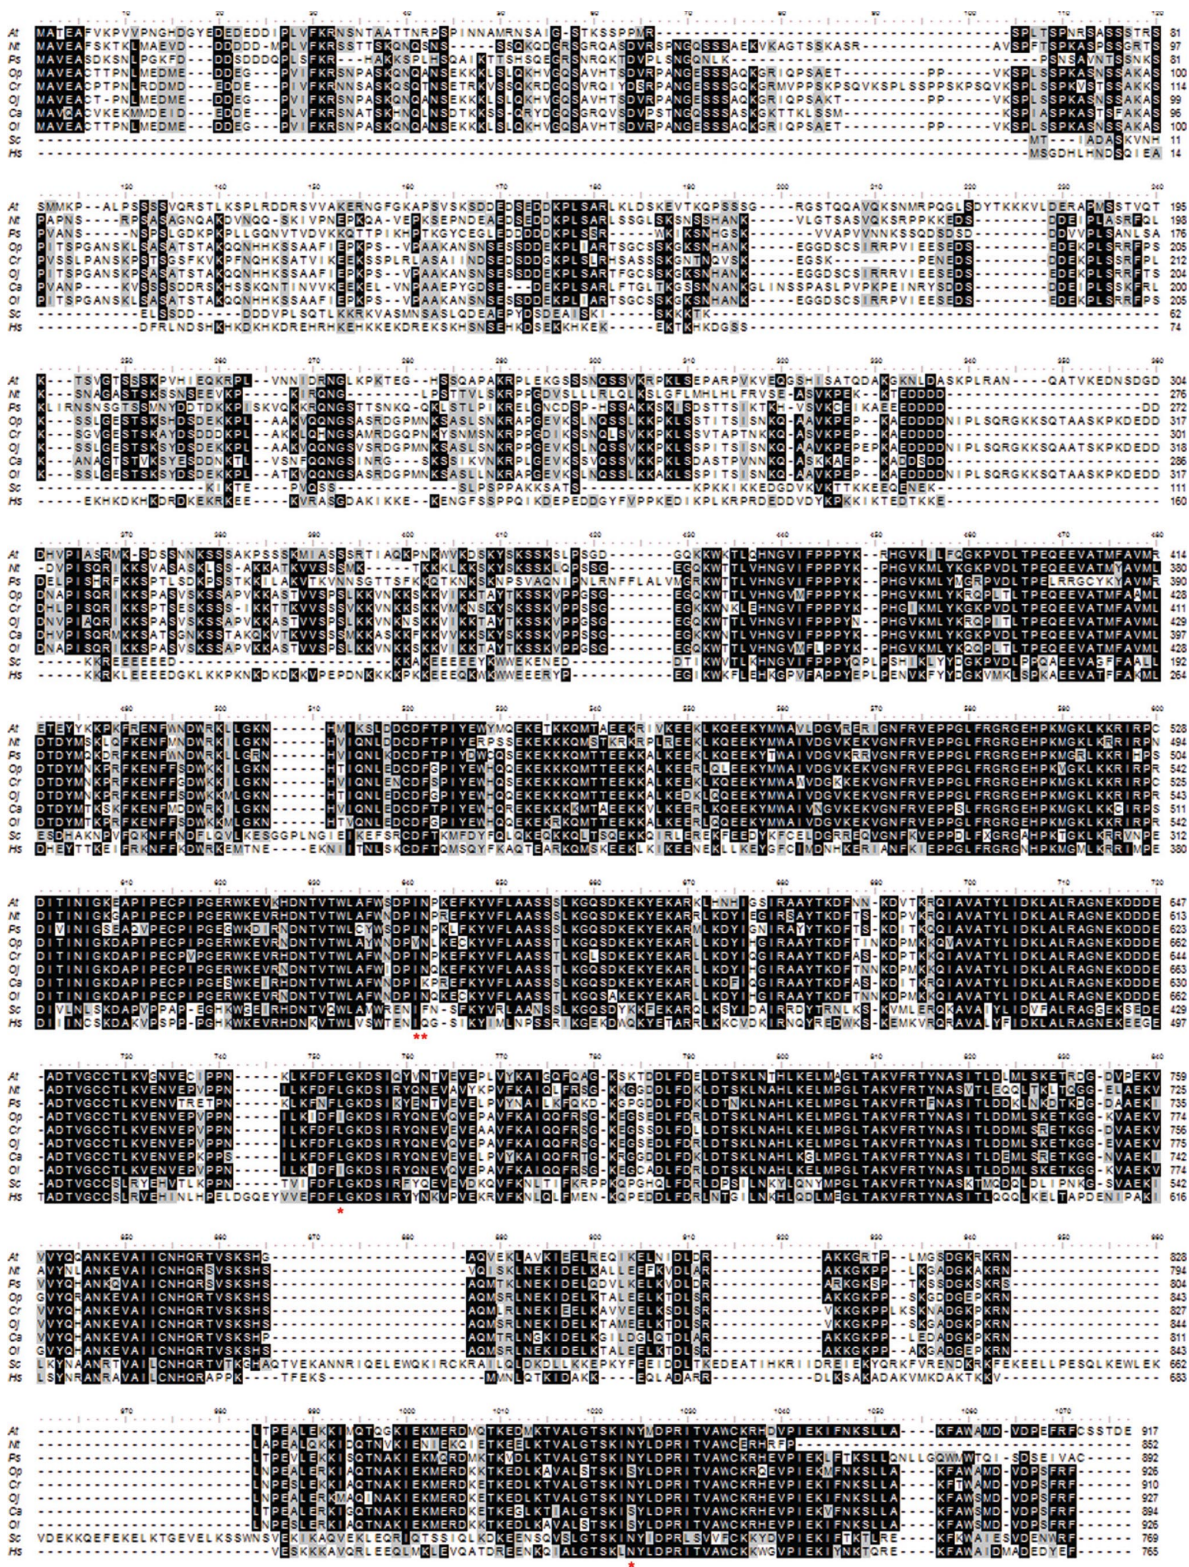

**Fig. S3.** Amino acid sequence alignment of Top1s. Amino acids with black, gray, and white backgrounds indicate identical, similar, and nonsimilar residues, respectively. The amino acid substitutions at position 420, 421, 530, and 722 are marked with red asterisks. At, *Arabidopsis thaliana*; Nt, *Nicotiana tabacum*; Ps, *Pisum sativum*; Op, *Ophiorrhiza pumila*; Cr, *Catharanthus roseus*; Oj, *Ophiorrhiza japonica*; Ca, *Camptotheca acuminata*; Oi, *Ophiorrhiza liukuensis*; Sc, *Saccharomyces cerevisiae*; Hs, *Homo sapiens*.



**Table S1. Quantitative CPT sensitivity assay in *Saccharomyces cerevisiae* mutant RS190**

| Gene                               | Relative number of viable cells at the CPT concentration indicated* |                    | CPT sensitivity |
|------------------------------------|---------------------------------------------------------------------|--------------------|-----------------|
|                                    | 0 $\mu\text{g/ml}$                                                  | 5 $\mu\text{g/ml}$ |                 |
| <i>OpTop1</i>                      | 1.00                                                                | 0.96               | R               |
| <i>OpTop1</i> ;Ile530Leu,Ser722Asn | 1.00                                                                | 0.77               | S/R             |
| <i>OjTop1</i>                      | 1.00                                                                | 0.52               | S/R             |
| <i>CrTop1</i>                      | 1.00                                                                | 0.02               | S               |

*S. cerevisiae* cells expressing plant Top1s as indicated were cultured in liquid medium containing CPT at 0 (0.25% Me<sub>2</sub>SO) or 5  $\mu\text{g/ml}$ . At 8 h, aliquots were diluted, plated on YPD medium, and incubated at 30°C. The number of viable cells forming colonies was counted. R, CPT-resistant Top1; S/R, partially CPT-resistant Top1; S, CPT-sensitive Top1. Note that Top1 of CPT-producing *O. pumila* is resistant to CPT. *OpTop1* mutant;Ile530Leu and Ser722Asn has become partially sensitive to CPT, suggesting the importance of these two residues in CPT resistance. Although neither *O. japonica* nor *C. roseus* produces CPT, *OjTop1* exhibits partial resistance to CPT compared with that of *C. roseus*, suggesting the concept of the CPT pre-resistance of Top1.

\*Average number obtained from three experiments. The number of viable forming colony was divided by the number of colonies obtained on plates with no CPT.
